# Supplementary material for: Targeting NAT10 Induces Apoptosis Associated With Enhancing Endoplasmic Reticulum Stress in Acute Myeloid Leukemia Cells
Source: PubMed Central journal article supplement (PMC7793641; doi:10.3389/fonc.2020.598107), 2020-12-17
Supplement: DataSheet_1.pdf [file DataSheet_1.pdf]

## Supplemental Figures

### **Targeting NAT10 induces apoptosis associated with enhancing endoplasmic reticulum stress in acute myeloid leukemia cells**

Jie Zi<sup>a</sup>, Qi Han<sup>a</sup>, Siyu Gu<sup>a</sup>, Mary McGrath<sup>b</sup>, Shriya Kane<sup>b,c</sup>, Zheng Ge<sup>a\*</sup>

<sup>a</sup>Department of Hematology, Zhongda Hospital, Medical School of Southeast University, Institute of Hematology Southeast University, Nanjing 210009, China ;

<sup>b</sup>Department of Pediatrics, Pennsylvania State University Medical College, Hershey, PA17033, USA.

<sup>c</sup>Georgetown University School of Medicine, Washington , DC 20007, USA

Running title: Targeting NAT10 inducing apoptosis in AML

\*Corresponding authors:

Zheng Ge, M.D., Ph.D. Department of Hematology, Zhongda Hospital, Medical School of Southeast University, Institute of Hematology Southeast University, No. 87, Dingjiaqiao, Nanjing 210009, Jiangsu, China.

Telephone: 86-25-83262468, FAX: 86-25-83262471, Email:Janege879@hotmail.com

Total words: 3930

Number of figures: 7

Number of table: 1

Supplemental figures: 4



**Supplemental Fig 1: NAT10 high expression in AML microarray cohorts studies** compared to that of normal leukocytes cells and monocytes. The microarray data for NAT10 (217884\_at) expression generated with MegaSampler (n=2462, MAS5.0) from human oncogenomics sever crossing all **microarray** database, which includes AML and normal control (leukocytes and monocytes) cohort studies.



**Supplemental Figure 2 Quantitative data for Western blot in NAT10 depletion and inhibition-mediated cell cycle-related proteins (A-D)** Quantitative data of the western-blot were generated by NIH ImageJ in the NAT10 depletion cells (A, B) and NAT10 inhibitor treatment cells (C, D). For data in A-D, graphed are the representative of one of 3 independent experiments



**Supplemental Figure 3 Quantitative data for Western blot in NAT10 depletion and inhibition-mediated apoptosis-related proteins (A-D)** Quantitative data of the western-blot were generated by NIH ImageJ in the NAT10 depletion cells (A, B) and NAT10 inhibitor treatment cells (C, D). For data in A-D, graphed are the representative of one of 3 independent experiments



**Supplemental Figure 3 Quantitative data for Western blot in NAT10 depletion and inhibition-mediated ER stress-related proteins (A-D)** Quantitative data of the western-blot were generated by NIH ImageJ in the NAT10 depletion cells (A, B) and NAT10 inhibitor treatment cells (C, D). For data in A-D, graphed are the representative of one of 3 independent experiments



**Supplemental Figure 4** Western-blotting analysis of the effect of NAT10 depletion by shRNA knockdown BH3-only proteins Bim and PUMA in U937 and MV4-11 cells.
